# Supplementary material for: “It's not one size fits all”; the use of videoconferencing for delivering therapy in a Specialist Paediatric Chronic Fatigue Service
Source: PubMed Central journal article supplement — Internet Interv. 2018 Dec 23;15:43–51. doi: 10.1016/j.invent.2018.12.003 (PMC6312867; doi:10.1016/j.invent.2018.12.003), 2018-12-23
Supplement: mmc1.pdf [file mmc1.pdf]

## **Semi-Structured Interview Schedule**

### ***Initial Question:***

How many times have you used Skype to attend appointments in the Paediatric Chronic Fatigue Service?

***Depending on Answer, follow the appropriate interview schedule, either 1 or 2***

### **Schedule 1: Does Not Use Skype to Attend Appointments**

Question: **What made you decide not to use Skype?**

Prompts:

- Expectations?
- Staff influence?
- Concerns?
- Why telephone or face to face over Skype?
- Location?

Question: **Tell me a bit about your experiences of using Skype in the past?**

Prompts:

- Positives experiences?
- Negative experiences?
- Any difficulties?
- Imagined difficulties of using Skype?
- Best things?
- Worst things?

Question: **Why do you think some young people want to use Skype?**

Prompts:

- Good experiences?
- What would influence their decision?
- Why don't you agree with them?

**Question: Do you have any thoughts or suggestions about how Skype appointments could be better?**

Prompts:

- Would that make you more likely to use Skype?

**Question: Is there anything you would like to add to or expand on regarding Skype appointments and what we have discussed today?**

Schedule 2: Initial Used Skype to Attend Appointments. But Then Opted Out

**Question: Tell me a bit about your experiences of using Skype**

Prompts:

- Positives experiences?
- Negative experiences?
- Any difficulties?
- Imagined difficulties of using Skype?
- Best things?
- Worst things?

**Question: What do you think influenced your decision to stop using Skype?**

Prompts:

- Expectations?
- Staff influence?
- Concerns?
- Why telephone or face to face over Skype?
- Location?

**Question: Why do you think some young people continue to use Skype?**

Prompts:

- Good experiences?
- What would influence their decision?
- Do you not agree with them?

**Question: Do you have any thoughts or suggestions about how Skype appointments could be better?**

Prompts:

- Would you ever use Skype again?
- What would have to change to mean you were more likely to use Skype?

**Question: Is there anything you would like to add to or expand on regarding Skype appointments and what we have discussed today?**
